# Supplementary material for: The CBL and CIPK Gene Family in Cucumber (Cucumis sativus): Genome-wide Analysis and Expression Profiles in Response to Abiotic and Biotic Stresses
Source: Research Square preprint supplement (doi:10.21203/rs.3.rs-7205177/v1), 2025-09-09
Supplement: Supplementary file 1 [file 371bce3b4879065c98cde7dd.xlsx]

## Sheet: Sheet1
Table S3. The primers of selected CsCBLs and CsCIPKs for qRT-PCR
Gene Name	Gene ID	Primer	Sequences
CsCBL4	CsaV3_3G008040.1	Forward	CCAACACTCCGAAGGCAGTCAAG
		Reverse	TTCACACAGAAGAGCCAACACCATC
CsCIPK1	CsaV3_1G028820.1	Forward	CAAGTGTCCGCCGTGGTTCTC
		Reverse	TTGGGATTCTGGTGTTCGGATTTGG
CsCIPK5	CsaV3_2G003670.1	Forward	ACGGCGAGCAGTGTAATATCTAAGC
		Reverse	CAGTTTCCCTTTTCTCCCCATCTCC
CsCIPK11	CsaV3_4G017300.1	Forward	CAGGATAAGAAGGGGTCCGTTTGC
		Reverse	CCACAACTCCAATAGCCTCCATCAC
CsCIPK13	CsaV3_4G036630.1	Forward	CGAATGTCCGCCGTGGTTCTC
		Reverse	GCGTGATTGCTCCGATTGTGATTC
CsCIPK15	CsaV3_6G000240.1	Forward	TGTCTTCATGCTTGGACCTTTCAGG
		Reverse	AGTTACAACATCCTCCATCCGCTTG
CsCIPK16	CsaV3_6G019060.1	Forward	TGTGGCAGCAGATGGAAATCAAGAG
		Reverse	GAAGCCAGCGGAAAGGGAGATG
Actin	Csa6G484600	Forward	TGCCTGCTATGTATGTTGCCATCC
		Reverse	CACCAGAATCCAGCACGATACCAG
