# Supplementary material for: The CBL and CIPK Gene Family in Cucumber (Cucumis sativus): Genome-wide Analysis and Expression Profiles in Response to Abiotic and Biotic Stresses
Source: Research Square preprint supplement (doi:10.21203/rs.3.rs-7205177/v1), 2025-09-09
Supplement: Supplementary file 2 [file 3be12e35f6220aa0b0c89405.xlsx]

## Sheet: Sheet1
Supplementary Table S1.The Ka/Ks values of the gene pairs in cucumber CsCBL and CsCIPK genes.
Gene Pairs	Seq_1	Seq_2	Ka	Ks	Ka_Ks	Note
CsCIPK18/CsCIPK3	CsaV3_6G050960.1	CsaV3_1G033260.1	0.343417	NaN	NaN	High Sequence Divergence Value (pS>=0.75)
CsCIPK16/CsCIPK17	CsaV3_6G019060.1	CsaV3_6G019070.1	0.404602	NaN	NaN	High Sequence Divergence Value (pS>=0.75)
CsCIPK13/CsCIPK1	CsaV3_4G036630.1	CsaV3_1G028820.1	0.328732	3.3288	0.098754
CsCIPK9/CsCIPK6	CsaV3_3G012720.1	CsaV3_2G013250.1	0.240242	3.29005	0.0730206
CsCIPK14/CsCIPK15	CsaV3_6G000230.1	CsaV3_6G000240.1	0.124859	0.609471	0.204865
CsCBL6/CsCBL2	CsaV3_3G049770.1	CsaV3_3G002200.1	0.106335	1.29356	0.0822032
