# Supplementary material for: The CBL and CIPK Gene Family in Cucumber (Cucumis sativus): Genome-wide Analysis and Expression Profiles in Response to Abiotic and Biotic Stresses
Source: Research Square preprint supplement (doi:10.21203/rs.3.rs-7205177/v1), 2025-09-09
Supplement: Supplementary file 3 [file 4de9305ce92a95d2a7d8f9c3.xlsx]

## Sheet: C. sativus-C. lanatus
Supplement table S2 One-to-one orthologous relationships of CBL and CIPK gene families
Gene Name in C.sativus	gene ID in C.sativus	gene ID in C. lanatus
7	CsaV3_6G048120.1	Cla97C01G020700.1
1	CsaV3_1G028820.1	Cla97C05G097340.1
1	CsaV3_1G028820.1	Cla97C06G121490.1
2	CsaV3_1G030280.1	Cla97C06G120430.1
3	CsaV3_1G033260.1	Cla97C01G023760.1
3	CsaV3_1G033260.1	Cla97C03G058910.1
4	CsaV3_1G036820.1	Cla97C03G057820.1
5	CsaV3_2G003670.1	Cla97C02G042800.1
6	CsaV3_2G013250.1	Cla97C05G085770.1
6	CsaV3_2G013250.1	Cla97C06G116120.1
1	CsaV3_2G025590.1	Cla97C08G160700.1
7	CsaV3_2G030480.1	Cla97C08G154960.1
2	CsaV3_3G002200.1	Cla97C09G175450.1
2	CsaV3_3G002200.1	Cla97C10G186730.1
3	CsaV3_3G003870.1	Cla97C10G188440.1
8	CsaV3_3G007670.1	Cla97C05G080490.1
4	CsaV3_3G008040.1	Cla97C05G080960.1
4	CsaV3_3G008040.1	Cla97C05G091190.1
9	CsaV3_3G012720.1	Cla97C05G085770.1
9	CsaV3_3G012720.1	Cla97C06G116120.1
10	CsaV3_3G015590.1	Cla97C05G088570.1
10	CsaV3_3G015590.1	Cla97C06G113640.1
5	CsaV3_3G019930.1	Cla97C05G091190.1
6	CsaV3_3G049770.1	Cla97C09G175450.1
6	CsaV3_3G049770.1	Cla97C10G186730.1
11	CsaV3_4G017300.1	Cla97C02G050400.1
12	CsaV3_4G027060.1	Cla97C04G073060.1
13	CsaV3_4G036630.1	Cla97C05G097340.1
13	CsaV3_4G036630.1	Cla97C06G121490.1
14	CsaV3_6G000230.1	Cla97C06G113630.1
16	CsaV3_6G019060.1	Cla97C02G045040.1
17	CsaV3_6G019070.1	Cla97C02G045030.1
18	CsaV3_6G050960.1	Cla97C01G023760.1
18	CsaV3_6G050960.1	Cla97C03G058910.1
19	CsaV3_6G051970.1	Cla97C01G024810.1
19	CsaV3_6G051970.1	Cla97C03G057820.1

## Sheet: C. sativus-C. maxima
Supplement table 2 One-to-one orthologous relationships of CBL and CIPK gene families
Gene Name in C.sativus	gene ID in C.sativus	gene ID in C.maxima
1	CsaV3_1G028820.1	CmaCh01G016600.1
1	CsaV3_1G028820.1	CmaCh09G004140.1
1	CsaV3_1G028820.1	CmaCh10G004780.1
1	CsaV3_1G028820.1	CmaCh11G004690.1
2	CsaV3_1G030280.1	CmaCh10G005440.1
2	CsaV3_1G030280.1	CmaCh11G005410.1
3	CsaV3_1G033260.1	CmaCh03G013260.1
3	CsaV3_1G033260.1	CmaCh07G001820.1
3	CsaV3_1G033260.1	CmaCh13G005990.1
3	CsaV3_1G033260.1	CmaCh18G004200.1
4	CsaV3_1G036820.1	CmaCh13G005160.1
5	CsaV3_2G003670.1	CmaCh05G012350.1
6	CsaV3_2G013250.1	CmaCh08G011150.1
6	CsaV3_2G013250.1	CmaCh14G017680.1
6	CsaV3_2G013250.1	CmaCh17G001950.1
1	CsaV3_2G025590.1	CmaCh12G006370.1
7	CsaV3_2G030480.1	CmaCh05G005610.1
7	CsaV3_2G030480.1	CmaCh12G001760.1
2	CsaV3_3G002200.1	CmaCh02G015750.1
2	CsaV3_3G002200.1	CmaCh06G008240.1
2	CsaV3_3G002200.1	CmaCh16G011000.1
2	CsaV3_3G002200.1	CmaCh19G003900.1
3	CsaV3_3G003870.1	CmaCh06G006960.1
3	CsaV3_3G003870.1	CmaCh16G009920.1
8	CsaV3_3G007670.1	CmaCh00G006860.1
8	CsaV3_3G007670.1	CmaCh06G009940.1
8	CsaV3_3G007670.1	CmaCh08G001620.1
8	CsaV3_3G007670.1	CmaCh14G021370.1
4	CsaV3_3G008040.1	CmaCh14G021080.1
4	CsaV3_3G008040.1	CmaCh16G000490.1
9	CsaV3_3G012720.1	CmaCh08G011150.1
9	CsaV3_3G012720.1	CmaCh14G017680.1
9	CsaV3_3G012720.1	CmaCh17G001950.1
10	CsaV3_3G015590.1	CmaCh06G015920.1
10	CsaV3_3G015590.1	CmaCh14G015550.1
10	CsaV3_3G015590.1	CmaCh17G003990.1
5	CsaV3_3G019930.1	CmaCh16G000490.1
6	CsaV3_3G049770.1	CmaCh02G015750.1
6	CsaV3_3G049770.1	CmaCh06G008240.1
6	CsaV3_3G049770.1	CmaCh16G011000.1
6	CsaV3_3G049770.1	CmaCh19G003900.1
11	CsaV3_4G017300.1	CmaCh02G011910.1
13	CsaV3_4G036630.1	CmaCh01G016600.1
13	CsaV3_4G036630.1	CmaCh09G004140.1
13	CsaV3_4G036630.1	CmaCh10G004780.1
13	CsaV3_4G036630.1	CmaCh11G004690.1
16	CsaV3_6G019060.1	CmaCh02G007060.1
16	CsaV3_6G019060.1	CmaCh20G003120.1
17	CsaV3_6G019070.1	CmaCh02G007040.1
17	CsaV3_6G019070.1	CmaCh20G003110.1
18	CsaV3_6G050960.1	CmaCh03G013260.1
18	CsaV3_6G050960.1	CmaCh07G001820.1
18	CsaV3_6G050960.1	CmaCh13G005990.1
18	CsaV3_6G050960.1	CmaCh18G004200.1
19	CsaV3_6G051970.1	CmaCh03G014240.1
19	CsaV3_6G051970.1	CmaCh13G005160.1

## Sheet: C. sativus-A. thaliana
Supplement table 2 One-to-one orthologous relationships of CBL and CIPK gene families
Gene Name in C.sativus	gene ID in C.sativus	gene ID in A. thaliana
1	CsaV3_1G028820.1	transcript:AT4G30960.1
3	CsaV3_1G033260.1	transcript:AT1G29230.1
3	CsaV3_1G033260.1	transcript:AT2G34180.1
3	CsaV3_1G033260.1	transcript:AT4G18700.1
3	CsaV3_1G033260.1	transcript:AT5G45810.1
4	CsaV3_1G036820.1	transcript:AT1G30270.1
4	CsaV3_1G036820.1	transcript:AT2G30360.1
4	CsaV3_1G036820.1	transcript:AT5G58380.1
6	CsaV3_2G013250.1	transcript:AT3G23000.1
6	CsaV3_2G013250.1	transcript:AT4G14580.1
1	CsaV3_2G025590.1	transcript:AT4G33000.1
2	CsaV3_3G002200.1	transcript:AT4G17615.3
2	CsaV3_3G002200.1	transcript:AT5G47100.1
8	CsaV3_3G007670.1	transcript:AT1G01130.1
8	CsaV3_3G007670.1	transcript:AT3G61960.1
4	CsaV3_3G008040.1	transcript:AT4G01420.1
9	CsaV3_3G012720.1	transcript:AT3G23000.1
9	CsaV3_3G012720.1	transcript:AT4G14580.1
10	CsaV3_3G015590.1	transcript:AT3G17510.1
5	CsaV3_3G019930.1	transcript:AT5G24270.2
6	CsaV3_3G049770.1	transcript:AT4G17615.3
6	CsaV3_3G049770.1	transcript:AT5G47100.1
13	CsaV3_4G036630.1	transcript:AT2G25090.1
13	CsaV3_4G036630.1	transcript:AT5G10930.1
13	CsaV3_4G036630.1	transcript:AT5G25110.1
14	CsaV3_6G000230.1	transcript:AT1G48260.1
14	CsaV3_6G000230.1	transcript:AT3G17510.1
17	CsaV3_6G019070.1	transcript:AT2G30360.1
7	CsaV3_6G048120.1	transcript:AT4G16350.1
18	CsaV3_6G050960.1	transcript:AT1G29230.1
18	CsaV3_6G050960.1	transcript:AT2G34180.1
18	CsaV3_6G050960.1	transcript:AT4G18700.1
18	CsaV3_6G050960.1	transcript:AT5G45810.1
19	CsaV3_6G051970.1	transcript:AT1G30270.1

## Sheet: C. sativus-O. sativa
Supplement table 2 One-to-one orthologous relationships of CBL and CIPK gene families
Gene Name in C.sativus	gene ID in C.sativus	gene ID in O.sativa
7	CsaV3_3G002200.1	transcript:Os10t0564800-01
7	CsaV3_3G049770.1	transcript:Os10t0564800-01
2	CsaV3_1G030280.1	transcript:Os06t0606000-01
3	CsaV3_1G033260.1	transcript:Os01t0206700-03
6	CsaV3_2G013250.1	transcript:Os03t0634400-01
9	CsaV3_3G012720.1	transcript:Os03t0634400-01
10	CsaV3_3G015590.1	transcript:Os03t0319400-01
12	CsaV3_4G027060.1	transcript:Os01t0824600-01
12	CsaV3_4G027060.1	transcript:Os05t0332300-01
12	CsaV3_4G027060.1	transcript:Os05t0476350-00
12	CsaV3_4G027060.1	transcript:Os07t0678600-01
12	CsaV3_4G027060.1	transcript:Os11t0113700-02
12	CsaV3_4G027060.1	transcript:Os12t0113500-02
18	CsaV3_6G050960.1	transcript:Os01t0206300-00
19	CsaV3_6G051970.1	transcript:Os07t0150700-01
